# Supplementary material
Source: Research Square preprint supplement (doi:10.21203/rs.3.rs-8968574/v1)
Supplement: Supplementary file 1 [file 623b6b95b4f7d9d0867f222a.docx]

Table 1: Classification of Storm by Dst Index (Vieira et al., 2001)

| Dst | Geomagnetic Activity |
| --- | --- |
| Dst<-200nT | Severe Storm |
| -200nT<Dst<-100nT | Intense Storm |
| -100nT<Dst<-50nT | Moderate Storm |
| -50nT<Dst<-20nT | Weak Storm |
| Dst>-20nT | Quiet Time |

Table 2: Number of severe storms in solar cycles 23 and 24

| Year | Number of severe storms in SC 23 | Year | Number of severe storms in SC 24 |
| --- | --- | --- | --- |
| 1996 | 0 | 2008 | 0 |
| 1997 | 0 | 2009 | 0 |
| 1998 | 2 | 2010 | 0 |
| 1999 | 1 | 2011 | 0 |
| 2000 | 4 | 2012 | 0 |
| 2001 | 3 | 2013 | 0 |
| 2002 | 0 | 2014 | 0 |
| 2003 | 2 | 2015 | 1 |
| 2004 | 1 | 2016 | 0 |
| 2005 | 2 | 2017 | 0 |
| 2006 | 0 | 2018 | 0 |
| 2007 | 0 | 2019 | 0 |

Table 3: Approximate occurrence time of severe storms of solar cycles 23 and 24

| Storm day Interval | Dst minimum (nT) | Approximate Time (UT) |
| --- | --- | --- |
| 03 – 05 May, 1998 | -205 | 04 May, 0500 |
| 24 – 26 September, 1998 | -207 | 25 September, 1000 |
| 21 – 23 October 1999 | -237 | 22 October, 0600 |
| 06 – 08 April, 2000 | -293 | 06 April, 2300 |
| 15 – 17 July, 2000 | -300 | 16 July, 0100 |
| 11 – 13 August, 2000 | -234 | 12 August, 1000 |
| 30 March – 01 April, 2001 | -387 | 31 March, 0800 |
| 10 – 12 April, 2001 | -271 | 11 April, 2300 |
| 29 – 31 October, 2003 | -383 | 30 October, 2300 |
| 07 – 11 November, 2004 | -375 | 08 November, 0600 |
| 14 – 16 May, 2005 | -247 | 15 May, 0900 |
| 17–18 March, 2015 | -234 | 17 March, 2300 |
